# Supplementary material for: Electrochemical biosensor based on cellulose nanofibers/graphene oxide and acetylcholinesterase for the detection of chlorpyrifos pesticide in water and fruit juice
Source: Royal Society of Chemistry journal article supplement (doi:10.1039/d3ra00512g), 2023-01-01
Supplement: d3ra00512g1.pdf [file d3ra00512g1.pdf]

## **Electrochemical biosensor based on cellulose nanofibers/graphene oxide and acetylcholinesterase for the detection of chlorpyrifos pesticide in water and fruit juice**

Wonn Shweyi Thet Tun<sup>a,b</sup>, Apichart Saenchoopa<sup>a</sup>, Sakda Daduang<sup>c</sup>, Jureerat Daduang<sup>d</sup>, Sirinan Kulchat<sup>a\*</sup>, Rina Patramanon<sup>b\*</sup>

<sup>a</sup>*Department of Chemistry, Faculty of Science, Khon Kaen University, Khon Kaen, 40002, Thailand.*

<sup>b</sup>*Department of Biochemistry, Faculty of Science, Khon Kaen University, Khon Kaen, 40002, Thailand.*

<sup>c</sup>*Faculty of Pharmaceutical Sciences, Khon Kaen University, Khon Kaen 40002, Thailand*

<sup>d</sup>*Department of Clinical Chemistry, Faculty of Associated Medical Sciences, Khon Kaen University, Khon Kaen, 40002, Thailand*

\*Email: narin@kku.ac.th

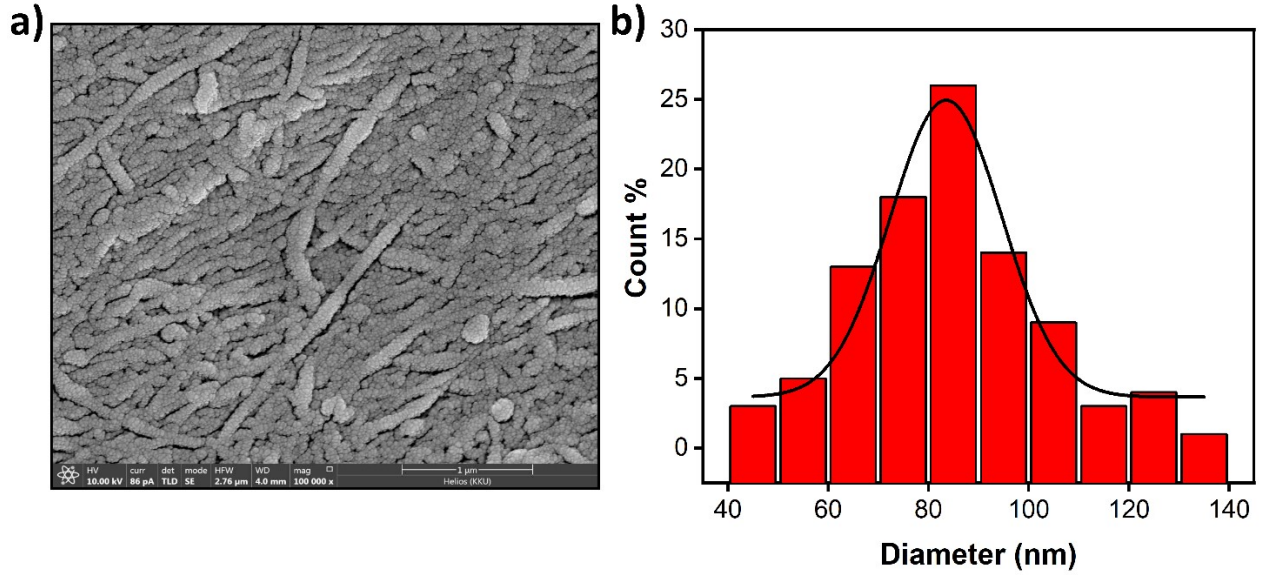

Figure S1.a) FE-SEM image of synthesized cellulose nanofibers (CNFs) from sugarcane bagasse and size distribution plot of the average diameter of CNFs from FE-SEM image ( $83.55 \pm 1.326$  nm,  $n=106$ ).

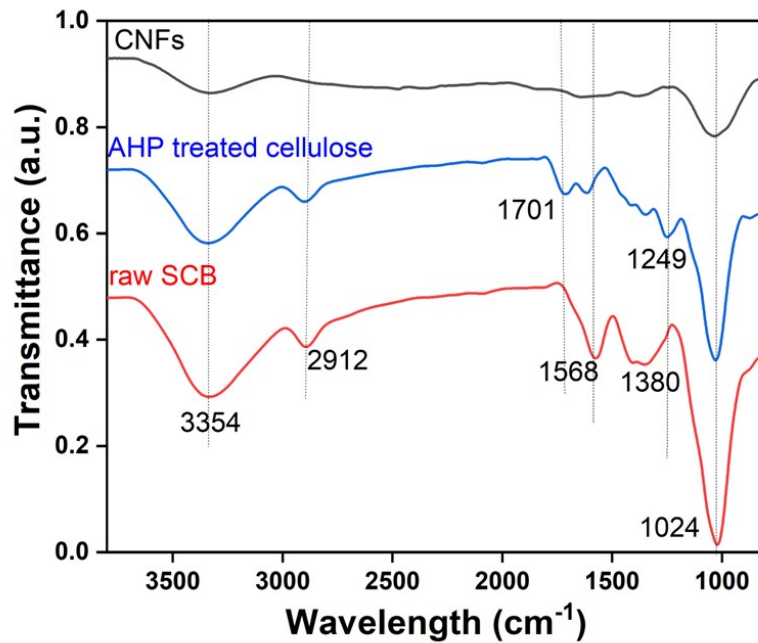

Figure S2. FTIR spectra of raw sugarcane bagasse (SCB), AHP hydrolyzed cellulose, and cellulose nanofibers (CNFs)

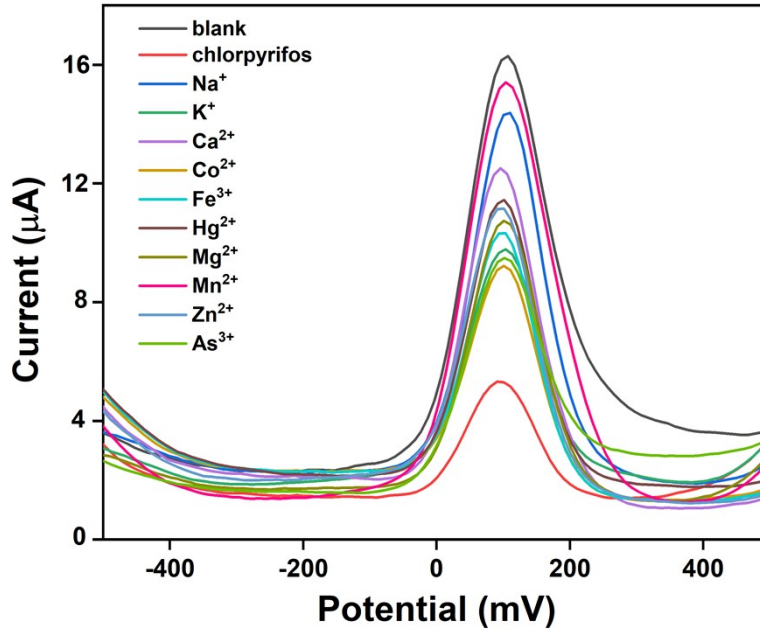

Figure S3. SWV performance of the modified AChE/CS-GO/GO/CNFs/ SPCEs in the presence of 0.5 µM of chlorpyrifos, Na<sup>+</sup>, K<sup>+</sup>, Ca<sup>2+</sup>, Co<sup>2+</sup>, Fe<sup>3+</sup>, Hg<sup>2+</sup>, Mg<sup>2+</sup>, Mn<sup>2+</sup>, Zn<sup>2+</sup>, As<sup>3+</sup>, respectively.

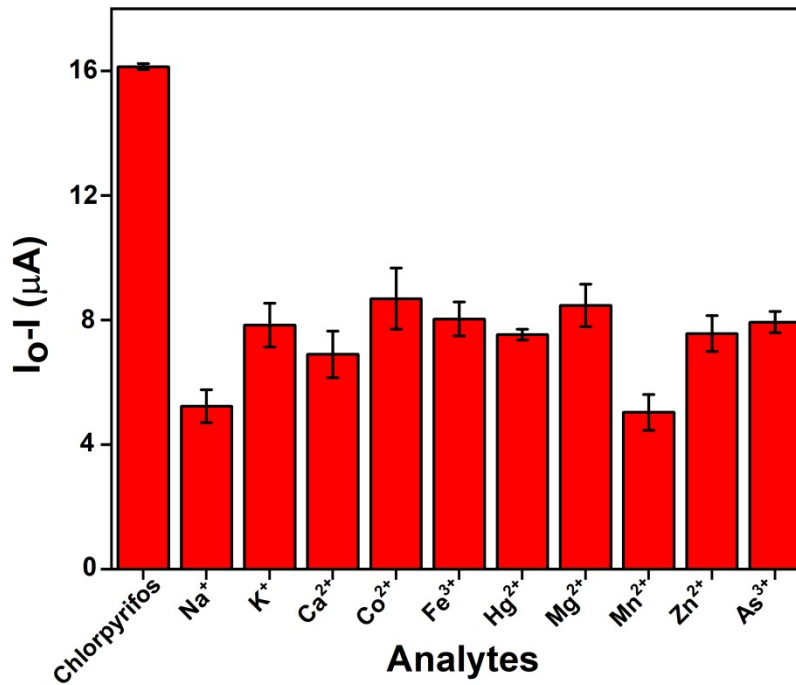

Figure S4. Histogram bar graph showing the currents ( $I_0 - I$ ) of chlorpyrifos and different analytes on the modified AChE/CS-GO/GO/CNFs/SPCEs where  $I_0$  and  $I$  were the currents of modified SPCEs in the absence and presence of chlorpyrifos and different analytes, respectively.

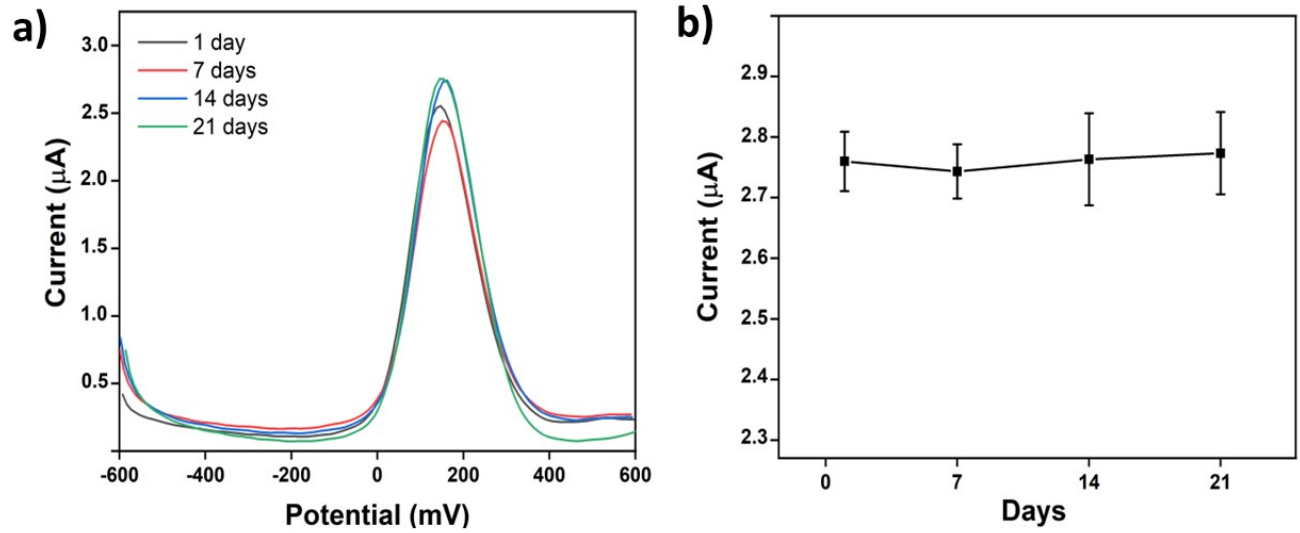

Figure S5. a) SWV performance of the modified AChE/CS-GO/GO/CNFs/ SPCEs with  $0.5\mu\text{M}$  of chlorpyrifos at different days ranging among 1, 7, 14, and 21 days and b) the day-dependent currents of modified AChE/CS-GO/GO/CNFs/ SPCEs.
